# Supplementary material for: Patient self-assessment of hospital pain, mood and health-related quality of life in adults with sickle cell disease
Source: PubMed Central journal article supplement — BMJ Open. 2012 Jul 2;2(4):e001274. doi: 10.1136/bmjopen-2012-001274 (PMC3391376; doi:10.1136/bmjopen-2012-001274), 2012-07-02
Supplement: bmjopen-2012-001274-s1.pdf [file bmjopen-2012-001274-s1.pdf]

# CHECKLIST

**Title**

**Abstract**

**Introduction**

**Objective**

**Methods**

Study Design

Setting

Measures

Statistical Analyses

**Results**

Descriptive Data

Outcome Data

**Discussion**

Key Results

Interpretation

Limitations

Generalizability

**Conclusion**
