# Supplementary material for: Patient self-assessment of hospital pain, mood and health-related quality of life in adults with sickle cell disease
Source: PubMed Central journal article supplement — BMJ Open. 2012 Jul 2;2(4):e001274. doi: 10.1136/bmjopen-2012-001274 (PMC3391376; doi:10.1136/bmjopen-2012-001274), 2012-07-02
Supplement: bmjopen-2012-001274.draft_revisions.pdf [file bmjopen-2012-001274.draft_revisions.pdf]

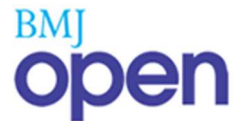

**PATIENT SELF-ASSESSMENT OF HOSPITAL PAIN AND  
HEALTH RELATED QUALITY OF LIFE IN ADULTS WITH  
SICKLE CELL DISEASE**

|                                 |                                                                                                                                                                                                                                                                                                                                                                                                                                                                                    |
|---------------------------------|------------------------------------------------------------------------------------------------------------------------------------------------------------------------------------------------------------------------------------------------------------------------------------------------------------------------------------------------------------------------------------------------------------------------------------------------------------------------------------|
| Journal:                        | <i>BMJ Open</i>                                                                                                                                                                                                                                                                                                                                                                                                                                                                    |
| Manuscript ID:                  | bmjopen-2012-001274                                                                                                                                                                                                                                                                                                                                                                                                                                                                |
| Article Type:                   | Research                                                                                                                                                                                                                                                                                                                                                                                                                                                                           |
| Date Submitted by the Author:   | 07-Apr-2012                                                                                                                                                                                                                                                                                                                                                                                                                                                                        |
| Complete List of Authors:       | Anie, Kofi; Central Middlesex Hospital, Haematology and Sickle Cell Centre<br>Grocott, Hannah; Central Middlesex Hospital, Haematology and Sickle Cell Centre<br>White, Lauren; Central Middlesex Hospital, Haematology and Sickle Cell Centre<br>Dzingina, Mendwas; National Institute of Health and Clinical Excellence,<br>Rogers, Gabriel; National Institute of Health and Clinical Excellence,<br>Cho, Gavin; Central Middlesex Hospital, Haematology and Sickle Cell Centre |
| <b>Primary Subject Heading</b>: | Haematology (incl blood transfusion)                                                                                                                                                                                                                                                                                                                                                                                                                                               |
| Secondary Subject Heading:      | Patient-centred medicine                                                                                                                                                                                                                                                                                                                                                                                                                                                           |
| Keywords:                       | Sickle Cell Disease, Pain, Quality of Life, Health Utility                                                                                                                                                                                                                                                                                                                                                                                                                         |
|                                 |                                                                                                                                                                                                                                                                                                                                                                                                                                                                                    |

SCHOLARONE™  
Manuscripts

only

PATIENT SELF-ASSESSMENT OF HOSPITAL PAIN AND HEALTH RELATED  
QUALITY OF LIFE IN ADULTS WITH SICKLE CELL DISEASE

Kofi A Anie<sup>1</sup>

Hannah Grocott<sup>1</sup>

Lauren White<sup>1</sup>

Mendwas Dzingina<sup>2</sup>

Gabriel Rogers<sup>2</sup>

Gavin Cho<sup>1</sup>

<sup>1</sup>Haematology and Sickle Cell Centre  
Central Middlesex Hospital  
London  
NW10 7NS  
UK

<sup>2</sup>National Institute of Health and Clinical Excellence  
Level 1A, City Tower  
Piccadilly Plaza  
Manchester  
M1 4BD  
UK

Correspondence to:

Kofi Anie  
Email: [kofi.anie@nhs.net](mailto:kofi.anie@nhs.net)  
Tel: +44 (0) 20 8453 2050  
Fax: +44 (0) 20 8453 2051

1  
2  
3 SUMMARY  
4  
5  
6

7 **Article Focus:**  
8

9 Acute pain is a hallmark of sickle cell disease for which hospital admissions may be required.  
10  
11 This study explores the relationship between patient self-assessments of pain, mood, and  
12  
13 health related quality of life with health utility (measured on the EQ-5D) during and after  
14  
15 hospital admissions.  
16  
17

18 **Key Messages:**  
19

20 Mood, general health, and quality of life steadily improve with reduction of pain during and  
21  
22 after an acute sickle cell pain episode.  
23  
24

25 A multidimensional approach to assessing sickle cell pain in hospital is useful. This helps to  
26  
27 identify co-morbidities such as mood changes that may affect length of stay with health care  
28  
29 coat implications.  
30  
31

32 **Strengths and Limitations:**  
33

34 Health utility indices for an in-patient sickle cell pain population are reported for the first  
35  
36 time. Quality of life and emotional changes are also highlighted. Nonetheless, this is based on  
37  
38 information from one setting, and may be different from others.  
39  
40  
41  
42  
43  
44  
45  
46  
47  
48  
49  
50  
51  
52  
53  
54  
55  
56  
57  
58  
59  
60

1  
2  
3 ABSTRACT  
4

5 **Objectives:**  
6

7 To characterize the relationship between adult patient self-reported sickle cell pain, mood and  
8 quality of life during and after hospital admissions.  
9

10  
11  
12  
13 **Design:**

14 Longitudinal study across three time points.  
15

16  
17 **Setting:**

18 Secondary care, single specialist sickle cell centre  
19

20  
21 **Participants:**

22 510 adult patients with sickle cell disease admitted to hospital daycare or inpatient units.  
23

24  
25 **Outcome measures:**

26 Self-assessments of pain, mood, and health related quality of life with health utility  
27 (measured on the EQ-5D) on admission, before discharge, and at one-week post discharge.  
28

29  
30  
31 **Results:**

32 Mood, general health, and quality of life showed significant steady improvements with  
33 reduction of pain in patients with sickle cell disease on admission to hospital, before  
34 discharge, and at one-week follow-up ( $p<0.01$ ). Health utility scores derived from the EQ-5D  
35 showed a negative association with pain in regression analysis over the three time points.  
36  
37  
38  
39  
40  
41

42  
43 **Conclusion:**

44 Examining health related quality of life and health utility in relation to pain during hospital  
45 admissions is valuable in terms of targeting appropriate psychological interventions within  
46 the context of a multidisciplinary approach to managing sickle cell pain. This has  
47 implications for health care costs.  
48  
49  
50  
51

52  
53  
54  
55 **KEY WORDS**  
56

57 Sickle cell disease, Pain, Quality of life, Health utility  
58  
59  
60

## INTRODUCTION

Pain associated with vaso-occlusion in sickle cell disease (SCD) is a life-long persistent and significant problem, which has profound medical, psychological, and social implications for affected patients and their families. Recurrent acute pain episodes in SCD are variable for which frequent hospitalisations may be required<sup>1,2</sup>. More than 90% of hospital admissions of patients with SCD in the UK have been shown to be for acute pain treatment<sup>3</sup>, and the management of acute painful episodes continues to pose a challenge for clinicians.

Sickle cell pain assessment is a crucial and difficult task. Accurate estimation of this pain is important in its control and management. Inadequate treatment for sickle cell pain continues to be an important problem, and a major issue is the restricted assessment methods utilised. Firstly, similar to other types of pain, there is no medical assessment or physiological measure of sickle cell pain that is objective. Pain assessment in patients with SCD is usually based on the opinion of clinical staff, and this may lead to discrepancies between their ratings of pain severity or the amount of pain relief required and that of patients<sup>4</sup>. Secondly, pain experiences are multidimensional, and quite importantly in sickle cell pain other dimensions including mood, general health, activity levels and sleep have to be considered<sup>5</sup>. In order to address these issues different strategies for the clinical management of sickle cell pain should be adopted to incorporate psychological assessments.

Patients with sickle cell pain who are admitted to Central Middlesex Hospital in London are treated with morphine (or alternative opioid) via a patient controlled analgesia (PCA) pump as standard. The multidisciplinary approach to the clinical management of sickle cell pain includes routine psychological assessments, which have been incorporated into the inpatient

1  
2  
3 protocols, and allow for appropriate interventions. These patients self-complete assessments  
4 referred to as the 'Sickle Cell Patient Self Assessment of Own Health State' (Diagram 1),  
5 which are administered on admission, before discharge, and at one week after discharge (by  
6 telephone call from a psychologist). This assessment form is mainly a combination of Health  
7 Related Quality of Life / Health Utility<sup>6</sup> and pain status measures. The EQ-5D is a  
8 standardised instrument for use as a measure of health outcome and health utility, which  
9 provides a simple descriptive profile and a single index value for health status. Pain status  
10 includes assessments of pain intensity and pain relief; there is also a mood score. The present  
11 study is based on a retrospective audit review of standard psychological assessments in adults  
12 with sickle cell pain admitted to Central Middlesex Hospital over a five-year period until the  
13 end of 2010.  
14  
15  
16  
17  
18  
19  
20  
21  
22  
23  
24  
25  
26  
27

## 28 29 OBJECTIVE

30  
31  
32  
33 The main aim of the study was to define the relationship between adult patient self-reported  
34 sickle cell pain, mood and health related quality of life (HRQoL) across three time-points  
35 during and after hospital admissions.  
36  
37  
38  
39  
40  
41

## 42 METHODS

43  
44  
45  
46 The 'Sickle Cell Patient Self Assessment of Own Health State' form comprises three sections  
47 (Diagram 1). The first section taken from the EQ-5D measures HRQoL in five dimensions:  
48 mobility; self-care; usual activities; pain/discomfort; anxiety/depression at three levels (1) no  
49 problems, (2) some problems, (3) extreme problems. There is also a general rating of health  
50 state on a scale of 0 (worst imaginable) to 100 (best imaginable). In the second section, there  
51 are ratings of pain intensity 0 (no pain) to 10 (worst possible pain), pain relief 0 (no relief) to  
52  
53  
54  
55  
56  
57  
58  
59  
60

1  
2  
3 10 (complete relief), mood 0 (worst mood) to 10 (best mood) and drowsiness 0 (not drowsy)  
4  
5 to 10 (asleep) on visual analogue scales (VAS). The final section requires patients to indicate  
6  
7 the location of their pain on a diagram of the body.  
8  
9

10  
11  
12 Data were extracted from consecutive cases of patients who were admitted over the five-year  
13  
14 period. These included patients admitted to the hospital Day-care centre, and Inpatient units  
15  
16 via the Accident and Emergency (A&E) department. There were three assessment time-  
17  
18 points: T1 – on admission to hospital; T2 – before discharge from hospital; T3 – 7 days post  
19  
20 discharge from hospital (telephone). Initial statistical analyses of demographic characteristics  
21  
22 and clinical characteristics included all patients.  
23  
24

25  
26  
27 The relationship between pain and HRQoL was examined over the three time-points since  
28  
29 this was of initial interest, and unique to this study. Health utility values were calculated from  
30  
31 the EQ-5D with a special calculator tool with data from various countries presented by  
32  
33 Szende *et al*<sup>7</sup>. UK health utility data is based on the time trade-off (TTO) valuation method  
34  
35 with weights derived from 3395 UK adults first reported by Kind *et al*<sup>8</sup>. The relationship  
36  
37 between pain score and EQ-5D-derived health utility was explored. Preliminary analysis  
38  
39 showed that there was no significant interaction between time-point and pain score in  
40  
41 predicting utility (i.e. although pain score decreased and utility increased over time, the  
42  
43 relationship between the two variables remained constant). Therefore, data from all time-  
44  
45 points were used in a single analysis. This approach meant that it was necessary to account  
46  
47 for within-person correlation, so a random-effects time-series regression model with *patient*  
48  
49 *ID* as a panel variable was used (xtreg command in Stata 8.0). Polynomial functions of pain  
50  
51 score were explored to improve model fit. Patient age and sex were not significant predictors  
52  
53 of utility (either as individual variables or in interaction with pain score), so these covariates  
54  
55  
56  
57  
58  
59  
60

were not included in the model.

## RESULTS

There were 510 admissions in total. Most of the patients had more than one hospital admission for acute sickle cell pain during the study period. Demographic characteristics of the patients are presented in Table 1.

**Table 1: Demographic and Clinical Characteristics of Adult Patients with Sickle Cell Disease**

| Variable        | Frequency        |
|-----------------|------------------|
| <i>Gender</i>   |                  |
| Male            | 199 (39%)        |
| Female          | 305 (60%)        |
| Unreported      | 6 (1%)           |
| <i>Location</i> |                  |
| Inpatient       | 463 (91%)        |
| Day-care        | 47 (9%)          |
|                 | <b>Mean (SD)</b> |
| <i>Age</i>      | 28.9 (10.2)      |

Day-care cases were excluded from t-test analyses owing to the difference in the length of stay from inpatient hospital admissions. Pain, mood, and general health status scores obtained from Inpatient cases are presented in Figure 1; in addition their health utility values obtained from the EQ-5D are presented in Figure 2.



### *Pain*

There was a significant reduction of pain VAS scores from admission T1 (Mean 5.1, SD 2.5) to discharge T2 (Mean 3.0, SD 2.4),  $t=9.29$ ,  $df=482$ ,  $p<0.001$  and from discharge T2 to one-week telephone follow up T3 (Mean 2.0, SD 2.2),  $t=4.69$ ,  $df=427$ ,  $p<0.001$ .

### *Mood*

There was a significant improvement in mood VAS scores from admission T1 (Mean 5.0, SD 2.2) to discharge T2 (Mean 5.7, SD 2.3),  $t=-3.23$ ,  $df=479$ ,  $p=0.001$ , and from discharge T2 to one week follow up T3 (Mean 6.8, SD 2.2),  $t=-4.90$ ,  $df=425$ ,  $p<0.001$ .

### *General Health Status*

Patients' reports of their general health on the VAS in addition showed significant improvements from admission T1 (Mean 47.7, SD 22.3) through discharge T2 (Mean 59.4, SD 21.7),  $t=-5.70$ ,  $df=459$ ,  $p<0.001$ , to one-week follow up T3 (Mean 71.0, SD 20.0),  $t=-5.63$ ,  $df=413$ ,  $p<0.001$ .

### *Health Related Quality of Life and Health Utility*

Furthermore, health utility values derived from the EQ-5D showed that patients significantly got better between T1 (Mean 0.39, SD 0.40) and T2 (Mean 0.65, SD 0.29),  $t=-7.95$ ,  $df=475$ ,  $p<0.001$ , and from T2 to T3 (Mean 0.75, SD 0.26),  $t=-3.94$ ,  $df=421$ ,  $p<0.001$ .

### *Pain and Health Related Quality of Life / Health Utility*

Figure 3 shows the relationship between pain and health utility for all patients across all three time-points. A simple linear model estimates the relationship as:  $utility = 0.890 - 0.089pain$

1  
2  
3 ( $R^2 = 0.437$ ). A slightly better fit to the data was obtained by introducing square and cube  
4  
5 functions to the model:  $utility = 0.887 - 0.124pain + 0.014pain^2 - 0.001pain^3$  ( $R^2 = 0.445$ ).  
6  
7

## 8 9 DISCUSSION

10  
11  
12  
13  
14 Acute pain episodes are the hallmark of SCD. Furthermore, adults with SCD have been  
15  
16 shown to have an impaired HRQoL as compared with the general population with pain and  
17  
18 psychological distress being contributors<sup>1,9</sup>. Unsurprisingly in this study, there was a  
19  
20 significant reduction in pain scores from admission to discharge and at one-week follow-up.  
21  
22 Nonetheless, it was interesting to observe that patients were not completely pain free on  
23  
24 discharge and importantly at one-week follow-up. A large 6-month pain diary study of adult  
25  
26 patients with SCD showed that 29% had sickle cell pain everyday<sup>2</sup>. This supports the notion  
27  
28 that acute pain episodes could develop into a type of chronic sickle cell pain.  
29  
30  
31

32  
33  
34 Health utilities are cardinal values that reflect the preferences of an individual – or a society –  
35  
36 for different health outcomes. They are measured on an interval scale with zero (0) reflecting  
37  
38 states of health equivalent to death and one (1) reflecting perfect health. Some health states  
39  
40 are considered to be worse than death, and have a negative value. Combined with survival  
41  
42 estimates, health utilities can be used to generate quality-adjusted life years (QALYs) for use  
43  
44 in cost–utility analyses of medical treatment. The EQ-5D is one of the commonly used  
45  
46 HRQoL instruments for measuring health utilities. In this study, HRQoL and health utility  
47  
48 values improved over the three time-points. This demonstrates that, although HRQoL in  
49  
50 patients with SCD is considerably impaired during acute painful episodes in hospital with  
51  
52 improvements after discharge, daily function may not be restored for quite some time and  
53  
54 steady-state HRQoL is likely to remain impaired. The mean health utility index of 0.75 at  
55  
56  
57  
58  
59  
60

1  
2  
3 one-week follow-up is comparable to the mean health utility index of 0.72 obtained from SF-  
4  
5 36 scores in a similar UK community based adult SCD population<sup>1</sup>. Studies from USA have  
6  
7 also reported similar HRQoL (SF-36) for people with SCD<sup>9,10</sup>.  
8  
9

10  
11 Although a correlation between pain and health utility is clearly identifiable in our dataset, it  
12  
13 is subject to a substantial degree of variability at the individual level. For example, it can be  
14  
15 seen in Figure 3 that one participant rated their pain level as 9 out of 10, suggesting very  
16  
17 intense discomfort, yet identified no health-state limitation on the EQ-5D questions (in the  
18  
19 process, answering 'I have no pain or discomfort' for the pain dimension of the instrument).  
20  
21 Nevertheless, on average, the expected negative correlation between pain score and health  
22  
23 utility is observed.  
24  
25  
26  
27

28  
29 When estimating health utility from pain score, it may be appropriate to prefer the  
30  
31 polynomial model to the simple linear fit, on the mathematical basis that it provides a very  
32  
33 slightly superior reflection the data, and also on the theoretical basis that it is more sensitive  
34  
35 to high pain scores (producing lower estimated utility values). It is known that EQ-5D  
36  
37 measurements are subject to 'floor' effects, and it is credible that most people would prefer  
38  
39 death to the prospect of spending the rest of their lives with a pain score of 10 (i.e. in the most  
40  
41 excruciating pain imaginable); this is consistent with a utility value of less than zero for such  
42  
43 health states.  
44  
45  
46  
47  
48

49 Pain is an important dimension in the HRQoL of patients with SCD. Patients with sickle cell  
50  
51 pain who are admitted to day-care, and through A&E seemed to have impaired HRQoL as a  
52  
53 result of pain, however this improved during the course of the admission, and at home over 7  
54  
55 days after discharge. In general, HRQoL is a crucial aspect of illness perception from the  
56  
57  
58  
59  
60

1  
2  
3 patient's viewpoint, incorporating psychological, social, and disease related factors. In the  
4  
5 absence of a universal cure in SCD, the primary aim of treatment is to reduce the impact of  
6  
7 the disease (pain in this case), thus enhancing quality of life.  
8  
9

10  
11 Mood changes in terms of anxiety and depression can be associated with sickle cell pain<sup>11,12</sup>.  
12  
13 General health status is also of importance because it affects the psychological well-being of  
14  
15 the patient. Mood and general health improved through admission to one-week follow-up.  
16  
17 Apart from pain, these could contribute to length of stay in hospital. That is, co-morbidity  
18  
19 could lead to poorer health outcomes and reduced HRQoL in patients with SCD. People with  
20  
21 long-term medical conditions including pain, frequently use health services, and are likely to  
22  
23 have mental health problems such as depression and anxiety<sup>13</sup>. Providing psychological  
24  
25 interventions can lead to better outcomes and a reduction in health care costs<sup>14</sup>.  
26  
27  
28  
29  
30  
31  
32  
33

## 34 CONCLUSION

35  
36  
37  
38 The study yielded results suggesting that a multidimensional approach to assessing patients  
39  
40 with SCD admitted to hospital is beneficial. This approach helps to identify problems for  
41  
42 which psychological support is required during and after the hospital admission, and is in  
43  
44 accordance with National Institute of Health and Clinical Excellence (NICE) guideline for the  
45  
46 management of patients with chronic illnesses<sup>15</sup>. Psychological interventions can be targeted  
47  
48 at inpatients to enhance the use of appropriate pain coping techniques, and strategies to  
49  
50 improve quality of life. Together with their treatment for sickle cell pain, this will help reduce  
51  
52 length of stay and related hospital costs.  
53  
54  
55  
56  
57  
58  
59  
60

1  
2  
3 AUTHORS CONTRIBUTION  
4  
5  
6

7 Kofi Anie conceived, designed the study, and performed some statistical analyses. Hannah  
8 Grocott and Lauren White were responsible for data collection and entry into the study  
9 database. Gabriel Rogers and Mendwas Dzingina performed statistical analyses. Gavin Cho  
10 was involved in the study oversight. Kofi Anie took the lead in the write up with review and  
11 editing by Gabriel Rogers, Mendwas Dzingina, and Gavin Cho. All authors read and  
12 approved the final manuscript.  
13  
14  
15  
16  
17  
18  
19

20  
21  
22  
23 COMPETING INTERESTS  
24  
25  
26

27 Kofi Anie was a co-opted expert to the NICE Guideline Development Group for the Sickle  
28 Cell Acute Painful Episode.  
29  
30  
31  
32  
33  
34  
35  
36  
37  
38  
39  
40  
41  
42  
43  
44  
45  
46  
47  
48  
49  
50  
51  
52  
53  
54  
55  
56  
57  
58  
59  
60

## REFERENCES

1. Anie KA, Steptoe A, Bevan DH. Sickle cell disease: pain, coping, and quality of life in a study of adults in the UK. *British Journal of Health Psychology*. 2002; 7: 331-344.
2. Smith WR, Penberthy LT, Bovbjerg VE et al. Daily Assessment of Pain in Adults with Sickle Cell Disease. *Annals of Internal Medicine*. 2008; 148:94-101.
3. Brozović M, Davies SC, Brownell AI. Acute admissions of patients with sickle cell disease who live in Britain. *British Medical Journal* 1987;294(6581):1206-8.
4. Shapiro BS, Benjamin LJ, Payne R et al. (1997). Sickle cell-related pain: perceptions of medical practitioners. *Journal of Pain and Symptom Management*. 1997; 14: 168-174.
5. Anie KA, Steptoe A. Pain, mood and opioid medication use in sickle cell disease. *The Hematology Journal*. 2003; 4: 71-73.
6. The EuroQol Group. EuroQol-a new facility for the measurement of health-related quality of life. *Health Policy*. 1990; 16(3):199-208
7. Szende A, Oppe M, Devlin N.(Eds). EQ-5D value sets: Inventory, comparative review and user guide. EuroQol Group Monographs Volume 2. Springer, 2006.
8. Kind P, Hardman G, Macran S. UK Population norms for EQ-5D. York Centre for Health Economics, Discussion Paper, University of York 1999.
9. McClish DK, Penberthy LT, Bovbjerg VE et al. Health related quality of life in sickle cell patients: the PiSCES project. *Health Quality of Life Outcomes*. 2005; 3:50
10. Woods KF, Miller MD, Johnson MH et al. Functional status and well-being in adults with sickle cell disease. *Journal of Clinical Outcomes Management*. 1997; 4(5): 15-21.
11. Gil KM, Carson JW, Porter LS et al. Daily Mood and Stress Predict Pain, Health Care Use, and Work Activity in African American Adults With Sickle-Cell Disease. *Health Psychology*. 2004; 23: 267-274.
12. Porter LS, Gil KM, Carson JW et al. The Role of Stress and Mood in Sickle Cell Disease Pain: An Analysis of Daily Diary Data *Journal of Health Psychology*. 2005; 5: 53-63.
13. Chapman DP, Perry GS, Strine TW. The vital link between chronic disease and depressive disorders. *Preventing Chronic Disease*. 2005; 3(2): 1-3.
14. Chiles JA, Lambert MJ, Hatch AL (1999). 'The impact of psychological interventions on medical cost offset: A meta-analytic review'. *Clinical Psychology: Science and Practice*. 1999; 6(2): 204-220.

1  
2  
3 15. NICE Clinical Guideline 91. Depression in adults with a chronic physical health problem.  
4 2009.  
5  
6  
7  
8  
9  
10  
11  
12  
13  
14  
15  
16  
17  
18  
19  
20  
21  
22  
23  
24  
25  
26  
27  
28  
29  
30  
31  
32  
33  
34  
35  
36  
37  
38  
39  
40  
41  
42  
43  
44  
45  
46  
47  
48  
49  
50  
51  
52  
53  
54  
55  
56  
57  
58  
59  
60

For peer review only





1  
2  
3 **Figure 1: Pain, Mood, and General Health Status Scores of Adult Patients with Sickle**  
4 **Cell Disease**  
5 (General Health Scores are scaled down from 100 to 10)  
6  
7  
8  
9  
10  
11  
12  
13  
14  
15  
16  
17  
18  
19  
20  
21  
22  
23  
24  
25  
26  
27  
28  
29  
30  
31  
32  
33  
34  
35  
36  
37  
38  
39  
40  
41  
42  
43  
44  
45  
46  
47  
48  
49  
50  
51  
52  
53  
54  
55  
56  
57  
58  
59  
60

For peer review only

1  
2  
3  
4  
5  
6  
7  
8  
9  
10  
11  
12  
13  
14  
15  
16  
17  
18  
19  
20  
21  
22  
23  
24  
25  
26  
27  
28  
29  
30  
31  
32  
33  
34  
35  
36  
37  
38  
39  
40  
41  
42  
43  
44  
45  
46  
47  
48  
49  
50  
51  
52  
53  
54  
55  
56  
57  
58  
59  
60

**Figure 2: Health Utility Indices of Adult Patients with Sickle Cell Disease**

For peer review only

**Figure 3: Relationship between Sickle Cell Pain and Health Utility**

For peer review only

1  
2  
3  
4  
5  
6  
7  
8  
9  
10  
11  
12  
13  
14  
15  
16  
17  
18  
19  
20  
21  
22  
23  
24  
25  
26  
27  
28  
29  
30  
31  
32  
33  
34  
35  
36  
37  
38  
39  
40  
41  
42  
43  
44  
45  
46  
47  
48  
49  
50  
51  
52  
53  
54  
55  
56  
57  
58  
59  
60

1  
2  
3  
4  
5  
6  
7  
8  
9  
10  
11  
12  
13  
14  
15  
16  
17  
18  
19  
20  
21  
22  
23  
24  
25  
26  
27  
28  
29  
30  
31  
32  
33  
34  
35  
36  
37  
38  
39  
40  
41  
42  
43  
44  
45  
46  
47  
48  
49  
50  
51  
52  
53  
54  
55  
56  
57  
58  
59  
60

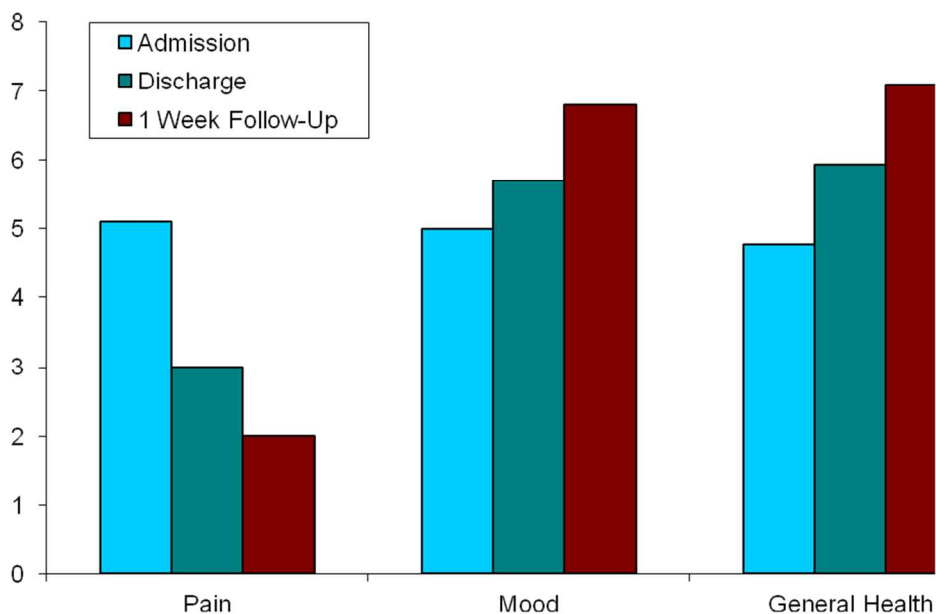

Figure 1  
342x226mm (72 x 72 DPI)

Review only

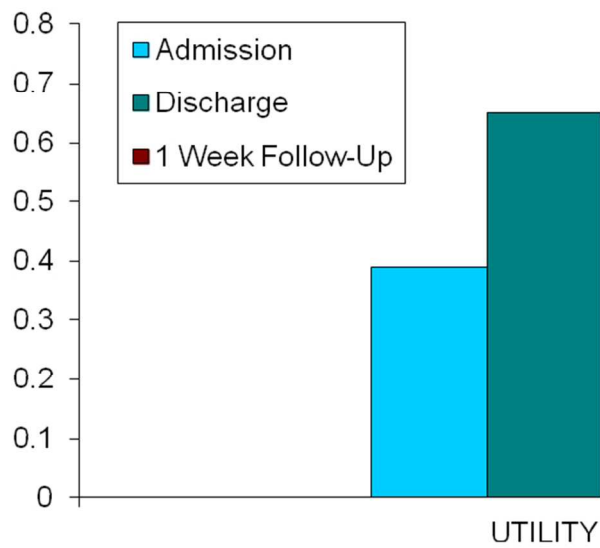

Figure 2  
301x170mm (72 x 72 DPI)

review only

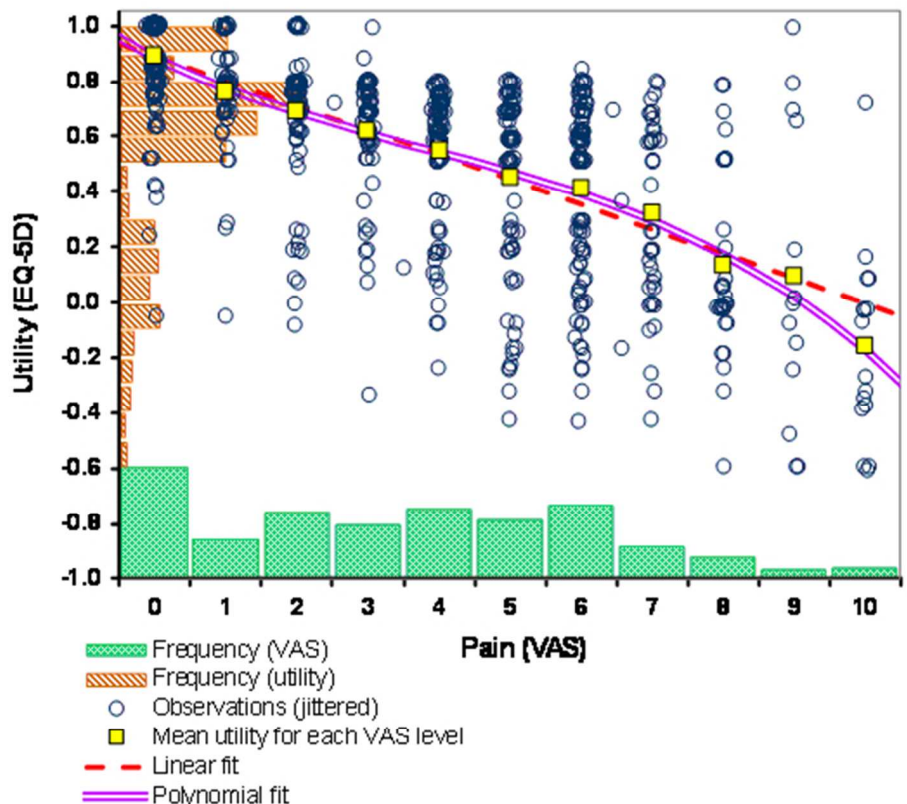

Figure 3  
203x175mm (72 x 72 DPI)



**PATIENT SELF-ASSESSMENT OF HOSPITAL PAIN, MOOD AND  
HEALTH RELATED QUALITY OF LIFE IN ADULTS WITH  
SICKLE CELL DISEASE**

|                                 |                                                                                                                                                                                                                                                                                                                                                                                                                                                                                    |
|---------------------------------|------------------------------------------------------------------------------------------------------------------------------------------------------------------------------------------------------------------------------------------------------------------------------------------------------------------------------------------------------------------------------------------------------------------------------------------------------------------------------------|
| Journal:                        | <i>BMJ Open</i>                                                                                                                                                                                                                                                                                                                                                                                                                                                                    |
| Manuscript ID:                  | bmjopen-2012-001274.R1                                                                                                                                                                                                                                                                                                                                                                                                                                                             |
| Article Type:                   | Research                                                                                                                                                                                                                                                                                                                                                                                                                                                                           |
| Date Submitted by the Author:   | 17-May-2012                                                                                                                                                                                                                                                                                                                                                                                                                                                                        |
| Complete List of Authors:       | Anie, Kofi; Central Middlesex Hospital, Haematology and Sickle Cell Centre<br>Grocott, Hannah; Central Middlesex Hospital, Haematology and Sickle Cell Centre<br>White, Lauren; Central Middlesex Hospital, Haematology and Sickle Cell Centre<br>Dzingina, Mendwas; National Institute of Health and Clinical Excellence,<br>Rogers, Gabriel; National Institute of Health and Clinical Excellence,<br>Cho, Gavin; Central Middlesex Hospital, Haematology and Sickle Cell Centre |
| <b>Primary Subject Heading</b>: | Haematology (incl blood transfusion)                                                                                                                                                                                                                                                                                                                                                                                                                                               |
| Secondary Subject Heading:      | Patient-centred medicine                                                                                                                                                                                                                                                                                                                                                                                                                                                           |
| Keywords:                       | Sickle Cell Disease, Pain, Quality of Life, Mood, Health Utility                                                                                                                                                                                                                                                                                                                                                                                                                   |
|                                 |                                                                                                                                                                                                                                                                                                                                                                                                                                                                                    |

SCHOLARONE™  
Manuscripts

Only

PATIENT SELF-ASSESSMENT OF HOSPITAL PAIN, MOOD, AND HEALTH  
RELATED QUALITY OF LIFE IN ADULTS WITH SICKLE CELL DISEASE

Kofi A Anie<sup>1</sup>

Hannah Grocott<sup>1</sup>

Lauren White<sup>1</sup>

Mendwas Dzingina<sup>2</sup>

Gabriel Rogers<sup>2</sup>

Gavin Cho<sup>1</sup>

<sup>1</sup>Haematology and Sickle Cell Centre  
Central Middlesex Hospital  
London  
NW10 7NS  
UK

<sup>2</sup>National Institute of Health and Clinical Excellence  
Level 1A, City Tower  
Piccadilly Plaza  
Manchester  
M1 4BD  
UK

Correspondence to:

Kofi Anie  
Email: [kofi.anie@nhs.net](mailto:kofi.anie@nhs.net)  
Tel: +44 (0) 20 8453 2050  
Fax: +44 (0) 20 8453 2051



## ABSTRACT

Acute pain is a hallmark of sickle cell disease for which frequent hospital admissions may be required, affecting the quality of life of patients. This study examined 510 adult inpatient self-assessments of pain, mood, and health related quality of life with health utility (measured on the EQ-5D) across three time points on admission, before discharge, and at one-week follow-up. Results showed that mood and health related quality of life steadily improve with reduction of pain during and after an acute sickle cell pain episode. Moreover, examining health utility in relation to pain during hospital admissions is valuable in terms of targeting appropriate psychological interventions within the context of a multidisciplinary approach to managing sickle cell pain. This has implications for health care costs.

## INTRODUCTION

Pain associated with vaso-occlusion in sickle cell disease (SCD) is a life-long persistent and significant problem, which has profound medical, psychological, and social implications for affected patients and their families. Recurrent acute pain episodes in SCD are variable for which frequent hospitalisations may be required<sup>1,2</sup>. More than 90% of hospital admissions of patients with SCD in the UK have been shown to be for acute pain treatment<sup>3</sup>, and the management of acute painful episodes continues to pose a challenge for haematologists.

Sickle cell pain assessment is a crucial and difficult task. Accurate estimation of this pain is important in its control and management. Inadequate treatment for sickle cell pain continues to be an important problem, and a major issue is the restricted assessment methods utilised. Firstly, similar to other types of pain, there is no medical assessment or physiological measure of sickle cell pain that is objective. Pain assessment and **treatment** in patients with SCD **have historically been** based on the opinion of clinical staff **within a particular medical setting**. This **may have led** to discrepancies between their ratings of pain severity or the amount of pain relief required and that of patients, **as highlighted in an earlier study**<sup>4</sup>. Secondly, pain experiences are multidimensional, and quite importantly in sickle cell pain other dimensions including mood, general health, activity levels and sleep have to be considered<sup>5</sup>. In order to address these issues different strategies for the clinical management of sickle cell pain should be adopted to incorporate psychological assessments.

Patients with sickle cell pain who are admitted to Central Middlesex Hospital in London are treated with morphine (or alternative opioid) via a patient controlled analgesia (PCA) pump as standard. The multidisciplinary approach to the clinical management of sickle cell pain

1  
2  
3 includes routine psychological assessments, which have been incorporated into the inpatient  
4 protocols, and allow for appropriate interventions. These patients self-complete assessments  
5 referred to as the 'Sickle Cell Patient Self Assessment of Own Health State' (Diagram 1),  
6 which are administered on admission, before discharge, and at one week after discharge (by  
7 telephone call from a psychologist). This assessment form is mainly a combination of Health  
8 Related Quality of Life / Health Utility<sup>6</sup> and pain status measures. The EQ-5D is a  
9 standardised instrument for use as a measure of health outcome and health utility, which  
10 provides a simple descriptive profile and a single index value for health status. Pain status  
11 includes assessments of pain intensity and pain relief; there is also a mood score. The present  
12 study is based on a retrospective audit review of standard psychological assessments in adults  
13 with sickle cell pain admitted to Central Middlesex Hospital over a five-year period until the  
14 end of 2010.

## 31 OBJECTIVE

32  
33  
34  
35  
36 The main aim of the study was to define the relationship between adult patient self-reported  
37 sickle cell pain, mood and health related quality of life (HRQoL) across three time-points  
38 during and after hospital admissions.

## 44 METHODS

45  
46  
47  
48  
49 This is a longitudinal hospital based study **examining data from a retrospective audit review.**  
50 **Therefore, no research question or hypotheses was proposed, and formal ethics approval was**  
51 **not required.** The 'Sickle Cell Patient Self Assessment of Own Health State' form comprises  
52 three sections (Diagram 1). The first section taken from the **standardised** EQ-5D measures  
53 HRQoL in five dimensions: mobility; self-care; usual activities; pain/discomfort;  
54  
55  
56  
57  
58  
59  
60

1  
2  
3 anxiety/depression at three levels (1) no problems, (2) some problems, (3) extreme problems.  
4  
5 There is also a visual analogue scale to record self-rated health state on a scale of 0 (worst  
6  
7 imaginable) to 100 (best imaginable). The second section is adapted from the Memorial Pain  
8  
9 Assessment Card (Fisherman et al. 1987), a standardised measure of pain which provides  
10  
11 ratings of pain intensity 0 (no pain) to 10 (worst possible pain), pain relief 0 (no relief) to 10  
12  
13 (complete relief), mood 0 (worst mood) to 10 (best mood) and drowsiness 0 (not drowsy) to  
14  
15 10 (asleep) on visual analogue scales (VAS). The final section requires patients to indicate  
16  
17 the location of their pain on a diagram of the body.  
18  
19  
20  
21  
22

23 Data were extracted from consecutive cases of patients who were admitted over the five-year  
24  
25 period. These included patients admitted to the hospital Day-care centre, and Inpatient units  
26  
27 via the Accident and Emergency (A&E) department. There were three assessment time-  
28  
29 points: T1 – on admission to hospital; T2 – before discharge from hospital; T3 – 7 days post  
30  
31 discharge from hospital (telephone). Initial statistical analyses of demographic characteristics  
32  
33 and clinical characteristics included all patients.  
34  
35  
36  
37  
38

39 The relationship between pain and HRQoL was examined by combining all the data points  
40  
41 across three time-points since this was of initial interest, and unique to this study. Health  
42  
43 utility values were calculated from the EQ-5D with a special calculator tool with data from  
44  
45 various countries presented by Szende *et al*<sup>7</sup>. UK health utility data is based on the time  
46  
47 trade-off (TTO) valuation method with weights derived from 3395 UK adults first reported  
48  
49 by Kind *et al*<sup>8</sup>. The relationship between pain score and EQ-5D-derived health utility was  
50  
51 explored. Preliminary analysis showed that there was no significant interaction between time-  
52  
53 point and pain score in predicting utility (i.e. although pain score decreased and utility  
54  
55 increased over time, the relationship between the two variables remained constant).  
56  
57  
58  
59  
60

1  
2  
3 Therefore, data from all **three** time-points were **combined** in a single analysis. This approach  
4  
5 meant that it was necessary to account for within-person correlation, so a random-effects  
6  
7 time-series regression model with *patient ID* as a panel variable was used (xtreg command in  
8  
9 Stata 8.0). Polynomial functions of pain score were explored to improve model fit. Patient  
10  
11 age and sex were not significant predictors of utility (either as individual variables or in  
12  
13 interaction with pain score), so these covariates were not included in the model.  
14  
15

## 16 17 18 RESULTS 19

20  
21  
22 There were 510 admissions in total. Most of the patients had more than one hospital  
23  
24 admission for acute sickle cell pain during the study period. Demographic characteristics of  
25  
26 the patients are presented in **Error! Reference source not found.** Day-care cases were excluded  
27  
28 from t-test analyses, and **Figures 1 and 2 (not from the utility analysis, Figure 3, as described**  
29  
30 **above). The average length of stay for inpatient hospital admissions with uncomplicated pain**  
31  
32 **episodes at Central Middlesex Hospital is about 3 days, whereas patients treated in day-care**  
33  
34 **are discharged within the same day, meaning the data are not comparable hence day-care**  
35  
36 **cases were removed from the analyses.** Pain, mood, and general health status scores obtained  
37  
38 from Inpatient cases are presented in Figure 1; in addition their health utility values obtained  
39  
40 from the EQ-5D are presented in Figure 2.  
41  
42  
43  
44

### 45 46 47 *Pain* 48

49  
50 There was a significant reduction of pain VAS scores from admission T1 (Mean 5.1, SD 2.5)  
51  
52 to discharge T2 (Mean 3.0, SD 2.4),  $t=9.29$ ,  $df=482$ ,  $p<0.001$  and from discharge T2 to one-  
53  
54 week telephone follow up T3 (Mean 2.0, SD 2.2),  $t=4.69$ ,  $df=427$ ,  $p<0.001$ .  
55  
56  
57  
58  
59  
60

### *Mood*

There was a significant improvement in mood VAS scores from admission T1 (Mean 5.0, SD 2.2) to discharge T2 (Mean 5.7, SD 2.3),  $t=-3.23$ ,  $df=479$ ,  $p=0.001$ , and from discharge T2 to one week follow up T3 (Mean 6.8, SD 2.2),  $t=-4.90$ ,  $df=425$ ,  $p<0.001$ .

### *General Health Status*

Patients' reports of their general health on the VAS in addition showed significant improvements from admission T1 (Mean 47.7, SD 22.3) through discharge T2 (Mean 59.4, SD 21.7),  $t=-5.70$ ,  $df=459$ ,  $p<0.001$ , to one-week follow up T3 (Mean 71.0, SD 20.0),  $t=-5.63$ ,  $df=413$ ,  $p<0.001$ .

### *Health Related Quality of Life and Health Utility*

Furthermore, health utility values derived from the EQ-5D showed that patients significantly got better between T1 (Mean 0.39, SD 0.40) and T2 (Mean 0.65, SD 0.29),  $t=-7.95$ ,  $df=475$ ,  $p<0.001$ , and from T2 to T3 (Mean 0.75, SD 0.26),  $t=-3.94$ ,  $df=421$ ,  $p<0.001$ .

### *Pain and Health Related Quality of Life / Health Utility*

Figure 3 shows the relationship between pain and health utility for all patients across all three time-points **combined**. A simple linear model estimates the relationship as:  $utility = 0.890 - 0.089pain$  ( $R^2 = 0.437$ ). A slightly better fit to the data was obtained by introducing square and cube functions to the model:  $utility = 0.887 - 0.124pain + 0.014pain^2 - 0.001pain^3$  ( $R^2 = 0.445$ ).

## DISCUSSION

Acute pain episodes are the hallmark of SCD. Furthermore, adults with SCD have been shown to have an impaired HRQoL as compared with the general population with pain and psychological distress being contributors<sup>1,9</sup>. Unsurprisingly in this study, there was a significant reduction in pain scores from admission to discharge and at one-week follow-up. Nonetheless, it was interesting to observe that patients were not completely pain free on discharge and importantly at one-week follow-up. A large 6-month pain diary study of adult patients with SCD showed that 29% had sickle cell pain everyday<sup>2</sup>. This supports the notion that acute pain episodes could develop into a type of chronic sickle cell pain. **The ongoing prevalence of pain further highlights the need for a multidimensional approach to pain management which extends beyond hospitalisation, and incorporates psychological interventions with coping strategies which can relieve pain and psychological distress whilst enhancing quality of life post-discharge.**

Health utilities are cardinal values that reflect the preferences of an individual – or a society – for different health outcomes. They are measured on an interval scale with zero (0) reflecting states of health equivalent to death and one (1) reflecting perfect health. Some health states are considered to be worse than death, and have a negative value. Combined with survival estimates, health utilities can be used to generate quality-adjusted life years (QALYs) for use in cost–utility analyses of medical treatment. The EQ-5D is one of the commonly used HRQoL instruments for measuring health utilities. In this study, HRQoL and health utility values, improved over the three time-points. This demonstrates that, although HRQoL in patients with SCD is considerably impaired during acute painful episodes in hospital with improvements after discharge, daily function may not be restored for quite some time and

1  
2  
3 steady-state HRQoL is likely to remain impaired. The mean health utility index of 0.75 at  
4  
5 one-week follow-up is comparable to the mean health utility index of 0.72 obtained from SF-  
6  
7 36 scores in a comparable UK community based adult SCD population<sup>1</sup>. Studies from USA  
8  
9 have also reported similar HRQoL (SF-36) for people with SCD <sup>9,10</sup>.

10  
11  
12  
13  
14 Although a correlation between pain and health utility is clearly identifiable in our dataset, it  
15  
16 is subject to a substantial degree of variability at the individual level. For example, it can be  
17  
18 seen in Figure 3 that one participant rated their pain level as 9 out of 10, suggesting very  
19  
20 intense discomfort, yet identified no health-state limitation on the EQ-5D questions (in the  
21  
22 process, answering 'I have no pain or discomfort' for the pain dimension of the instrument).  
23  
24 Nevertheless, on average, the expected negative correlation between pain score and health  
25  
26 utility is observed.  
27  
28  
29  
30  
31

32 When estimating health utility from pain score, it may be appropriate to prefer the  
33  
34 polynomial model to the simple linear fit, on the mathematical basis that it provides a very  
35  
36 marginally superior reflection the data, and also on the theoretical basis that it is more  
37  
38 sensitive to high pain scores (producing lower estimated utility values). It is known that EQ-  
39  
40 5D measurements are subject to 'floor' effects, and it is credible that most people would  
41  
42 prefer death to the prospect of spending the rest of their lives with a pain score of 10 (i.e. in  
43  
44 the most excruciating pain imaginable); this is consistent with a utility value of less than zero  
45  
46 for such health states.  
47  
48  
49  
50  
51

52 Pain is an important dimension in the HRQoL of patients with SCD. Patients with sickle cell  
53  
54 pain who are admitted to day-care, and through A&E seemed to have impaired HRQoL as a  
55  
56 result of pain, however this improved during the course of the admission, and at home over 7  
57  
58  
59  
60



1  
2  
3 days after discharge. In general, HRQoL is a crucial aspect of illness perception from the  
4  
5 patient's viewpoint, incorporating psychological, social, and disease related factors. In the  
6  
7 absence of a universal cure in SCD, the primary aim of treatment is to reduce the impact of  
8  
9 the disease (pain in this case), thus enhancing quality of life.  
10

11  
12  
13  
14 It should also be noted that HRQoL has a relationship with the psychological well-being and  
15  
16 experience in patients with pain, and this is influenced by their coping strategies. These  
17  
18 finding could have been influenced by these phenomena.  
19

20  
21  
22  
23 Mood changes in terms of anxiety and depression can be associated with sickle cell pain<sup>11,12</sup>.  
24  
25 General health status is also of importance because it affects the psychological well-being of  
26  
27 the patient. Mood and general health improved through admission to one-week follow-up. **In  
28  
29 addition to pain, these factors could contribute to length of stay in hospital and would be an  
30  
31 interesting area for future research. People with long-term medical conditions including pain,  
32  
33 frequently use health services, and are likely to have co-morbid mental health problems such  
34  
35 as depression and anxiety<sup>13</sup>. The provision of psychological assessments and interventions,  
36  
37 in an acute hospital setting, could improve health outcomes by facilitating the use of effective  
38  
39 coping strategies<sup>1</sup> and managing co-morbid mood disorders. This could result in a reduced  
40  
41 length of stay in hospital, and a reduction in health care costs.**  
42  
43  
44  
45

## 46 47 CONCLUSION

48  
49  
50  
51  
52 The study yielded results suggesting that a multidimensional approach **to the assessment and  
53  
54 treatment of** patients with SCD admitted to hospital is beneficial. This approach helps to  
55  
56 identify problems for which psychological support is required during and after the hospital  
57  
58  
59  
60

1  
2  
3 admission, and is in accordance with National Institute of Health and Clinical Excellence  
4 (NICE) guideline for the management of patients with chronic illnesses<sup>15</sup>. Psychological  
5 interventions can be targeted at inpatients to enhance the use of appropriate pain coping  
6 techniques, **alleviate any co-morbid mental health difficulties, and ultimately improve quality**  
7 **of life**. Together with their usual treatment for sickle cell pain, this will help reduce length of  
8 stay and related hospital costs.  
9  
10  
11  
12  
13  
14  
15  
16  
17  
18  
19

#### 20 21 22 23 24 25 26 27 28 29 30 31 32 33 34 35 36 37 38 39 40 41 42 43 44 45 46 47 48 49 50 51 52 53 54 55 56 57 58 59 60

AUTHORS CONTRIBUTION

Kofi Anie conceived, designed the study, and performed some statistical analyses. Hannah Grocott and Lauren White were responsible for data collection and entry into the study database. Gabriel Rogers and Mendwas Dzingina performed statistical analyses. Gavin Cho was involved in the study oversight. Kofi Anie took the lead in the write up with review and editing by Gabriel Rogers, Mendwas Dzingina, and Gavin Cho. All authors read and approved the final manuscript.

#### COMPETING INTERESTS

Kofi Anie was a co-opted expert to the NICE Guideline Development Group for the Sickle Cell Acute Painful Episode.

The authors declare that there is: no support from any organisation for the submitted work; no financial relationships with any organisations that might have an interest in the submitted work in the previous three years; no other relationships or activities that could appear to have influenced the submitted work.

## LICENCE AGREEMENT

The Corresponding Author has the right to grant on behalf of all authors and does grant on behalf of all authors, an exclusive licence (or non-exclusive for government employees) on a worldwide basis to the BMJ Publishing Group Ltd and its Licensees to permit this article (if accepted) to be published in BMJ editions and any other BMJ PGL products and sublicenses to exploit all subsidiary rights.

## REFERENCES

1. Anie KA, Steptoe A, Bevan DH. Sickle cell disease: pain, coping, and quality of life in a study of adults in the UK. *British Journal of Health Psychology*. 2002; 7: 331-344.
2. Smith WR, Penberthy LT, Bovbjerg VE, McClish DK, Roberts JD, Dahman B, et al. Daily Assessment of Pain in Adults with Sickle Cell Disease. *Annals of Internal Medicine*. 2008; 148:94-101.
3. Brozović M, Davies SC, Brownell AI. Acute admissions of patients with sickle cell disease who live in Britain. *British Medical Journal* 1987;294(6581):1206-8.
4. Shapiro, B.S., Benjamin, L.J., Payne, R. and Heidrich, G. (1997). Sickle cell-related pain: perceptions of medical practitioners. *Journal of Pain and Symptom Management*.1997; 14: 168-174.
5. Anie KA and Steptoe A. Pain, mood and opioid medication use in sickle cell disease. *The Hematology Journal*. 2003; 4: 71-73.
6. The EuroQol Group. EuroQol-a new facility for the measurement of health-related quality of life. *Health Policy*. 1990; 16(3):199-208
7. Szende A, Oppe M, Devlin N.(Eds). EQ-5D value sets: Inventory, comparative review and user guide. EuroQol Group Monographs Volume 2. Springer, 2006.
8. Kind P, Hardman G, Macran S. UK Population norms for EQ-5D. York Centre for Health Economics, Discussion Paper, University of York 1999.
9. McClish DK, Penberthy LT, Bovbjerg VE, Roberts JD, Aisiku IP, Levenson JL, Roseff SD, Smith WR. Health related quality of life in sickle cell patients: the PiSCES project. *Health Quality of Life Outcomes*. 2005; 3:50
10. Woods KF, Miller MD, Johnson MH, Tracy A, Kutlar A and Cassel CK (1997). Functional status and well-being in adults with sickle cell disease. *Journal of Clinical Outcomes Management*. 1997; 4(5): 15–21.
11. Gil KM, Carson JW, Porter LS, Scipio C, Bediako SM, Orringer E (2004). Daily Mood and Stress Predict Pain, Health Care Use, and Work Activity in African American Adults With Sickle-Cell Disease. *Health Psychology*. 2004; 23: 267-274.
12. Porter LS, Gil KM, Carson JW, Anthony KK, Ready. The Role of Stress and Mood in Sickle Cell Disease Pain: An Analysis of Daily Diary Data *Journal of Health Psychology*. 2005; 5: 53-63.
13. Chapman DP, Perry GS, Strine TW. 'The vital link between chronic disease and depressive disorders. *Preventing Chronic Disease*. 2005; 3(2): 1-3.

1  
2  
3 14. Chiles JA, Lambert MJ, Hatch AL (1999). 'The impact of psychological interventions on  
4 medical cost offset: A meta-analytic review'. *Clinical Psychology: Science and Practice*.  
5 1999; 6(2): 204–220.  
6

7 15. NICE Clinical Guideline 91. Depression in adults with a chronic physical health problem.  
8 2009.  
9

10  
11  
12  
13  
14  
15  
16  
17  
18  
19  
20  
21  
22  
23  
24  
25  
26  
27  
28  
29  
30  
31  
32  
33  
34  
35  
36  
37  
38  
39  
40  
41  
42  
43  
44  
45  
46  
47  
48  
49  
50  
51  
52  
53  
54  
55  
56  
57  
58  
59  
60

For peer review only



**Table 1: Demographic and Clinical Characteristics of Adult Patients with Sickle Cell Disease**

| <b>Variable</b> | <b>Frequency</b> |
|-----------------|------------------|
| <i>Gender</i>   |                  |
| Male            | 199 (39%)        |
| Female          | 305 (60%)        |
| Unreported      | 6 (1%)           |
| <i>Location</i> |                  |
| Inpatient       | 463 (91%)        |
| Day-care        | 47 (9%)          |
|                 | <b>Mean (SD)</b> |
| <i>Age</i>      | 28.9 (10.2)      |

1  
2  
3  
4  
5  
6  
7  
8  
9  
10  
11  
12  
13  
14  
15  
16  
17  
18  
19  
20  
21  
22  
23  
24  
25  
26  
27  
28  
29  
30  
31  
32  
33  
34  
35  
36  
37  
38  
39  
40  
41  
42  
43  
44  
45  
46  
47  
48  
49  
50  
51  
52  
53  
54  
55  
56  
57  
58  
59  
60

**Figure 1: Pain, Mood, and General Health Status Scores of Adult Patients with Sickle Cell Disease**

(General Health Scores are scaled down from 100 to 10)

For peer review only



Figure 2: Health Utility Indices of Adult Patients with Sickle Cell Disease

For peer review only

1  
2  
3  
4  
5  
6  
7  
8  
9  
10  
11  
12  
13  
14  
15  
16  
17  
18  
19  
20  
21  
22  
23  
24  
25  
26  
27  
28  
29  
30  
31  
32  
33  
34  
35  
36  
37  
38  
39  
40  
41  
42  
43  
44  
45  
46  
47  
48  
49  
50  
51  
52  
53  
54  
55  
56  
57  
58  
59  
60

1  
2  
3  
4  
5  
6  
7  
8  
9  
10  
11  
12  
13  
14  
15  
16  
17  
18  
19  
20  
21  
22  
23  
24  
25  
26  
27  
28  
29  
30  
31  
32  
33  
34  
35  
36  
37  
38  
39  
40  
41  
42  
43  
44  
45  
46  
47  
48  
49  
50  
51  
52  
53  
54  
55  
56  
57  
58  
59  
60

**Figure 3: Relationship between Sickle Cell Pain and Health Utility**

For peer review only

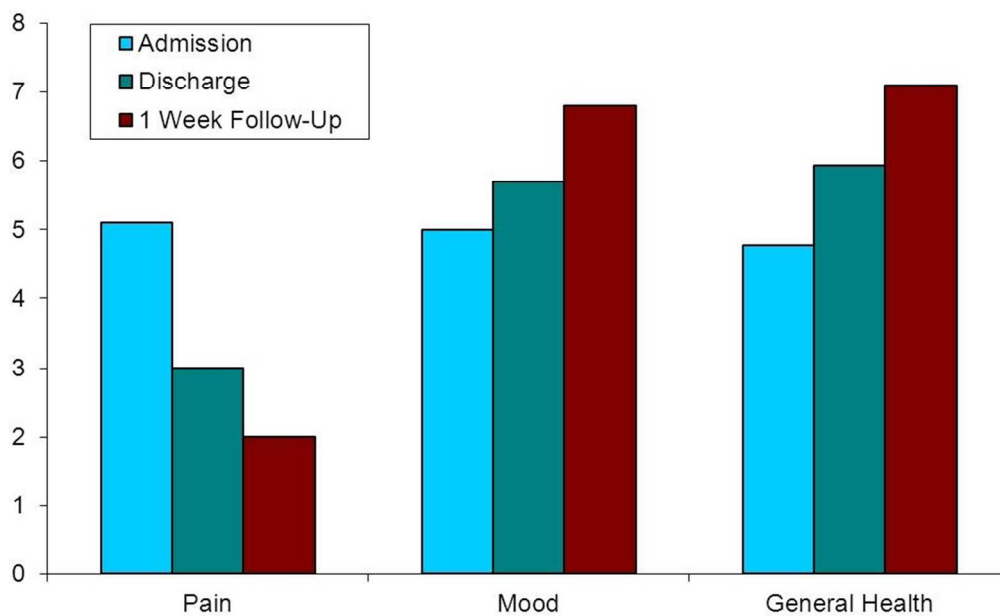

257x169mm (96 x 96 DPI)

Review only

1  
2  
3  
4  
5  
6  
7  
8  
9  
10  
11  
12  
13  
14  
15  
16  
17  
18  
19  
20  
21  
22  
23  
24  
25  
26  
27  
28  
29  
30  
31  
32  
33  
34  
35  
36  
37  
38  
39  
40  
41  
42  
43  
44  
45  
46  
47  
48  
49  
50  
51  
52  
53  
54  
55  
56  
57  
58  
59  
60

1  
2  
3  
4  
5  
6  
7  
8  
9  
10  
11  
12  
13  
14  
15  
16  
17  
18  
19  
20  
21  
22  
23  
24  
25  
26  
27  
28  
29  
30  
31  
32  
33  
34  
35  
36  
37  
38  
39  
40  
41  
42  
43  
44  
45  
46  
47  
48  
49  
50  
51  
52  
53  
54  
55  
56  
57  
58  
59  
60

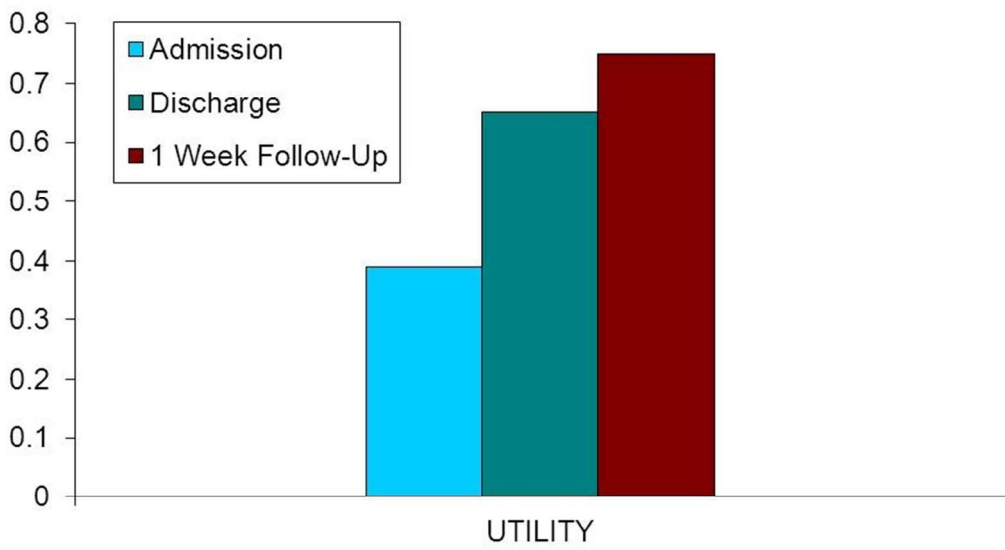

226x135mm (96 x 96 DPI)

review only

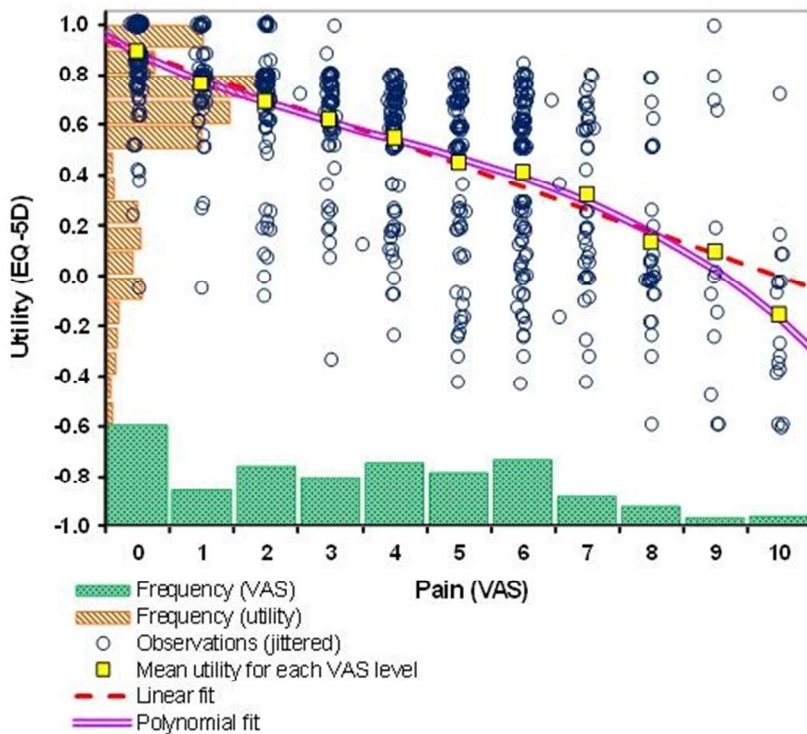

169x135mm (96 x 96 DPI)
